# Supplementary material for: Genome-wide DNA copy number analysis in clonally expanded human ovarian cancer cells with distinct invasive/migratory capacities
Source: PubMed Central journal article supplement (PMC5362473; doi:10.18632/oncotarget.14767), 2017-01-20
Supplement: oncotarget-08-15136-s001.pdf [file oncotarget-08-15136-s001.pdf]

# Genome-wide DNA copy number analysis in clonally expanded human ovarian cancer cells with distinct invasive/migratory capacities

## Supplementary Materials

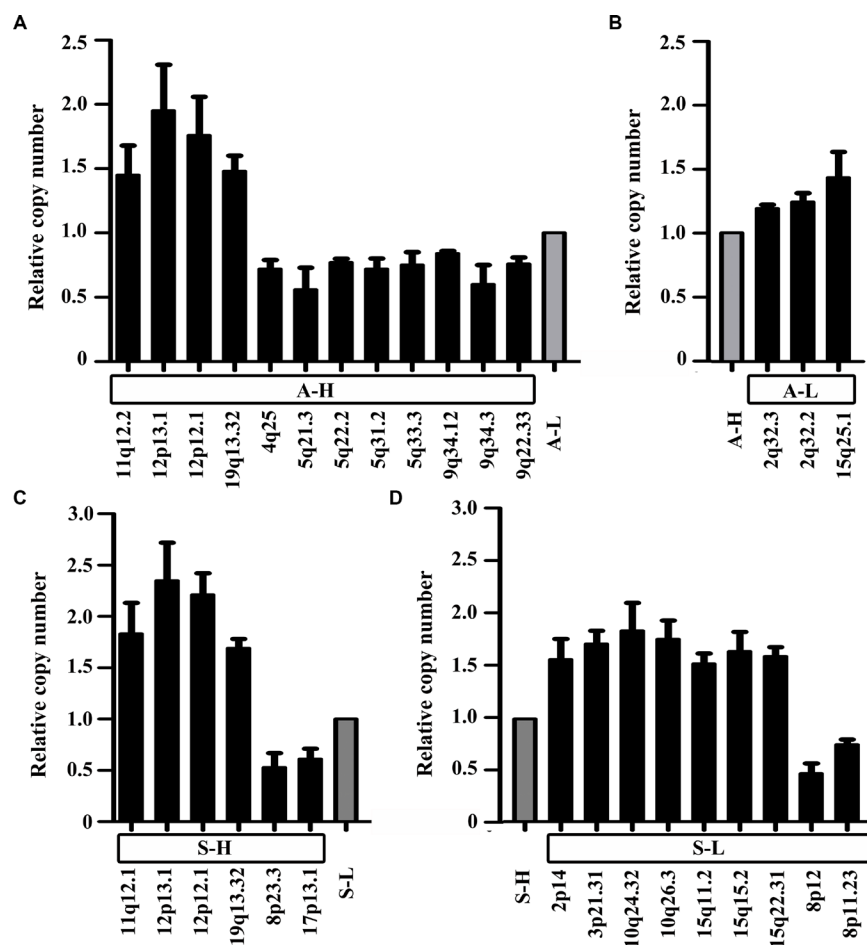

**Supplementary Figure 1: Validation of the CNV data.** Relative gene copy numbers in the selected regions were determined by RT-PCR with DNA from (A, B) A-H and A-L or (C, D) S-H and S-L cells. The data shown are the average values from three independent experiments  $\pm$  SEM. For (A,C), the relative gene copy numbers of A-L/S-L cells were set as 1 and those of A-H/S-H cells were normalized to these values, whereas for (B,D), the relative gene copy numbers of A-H/S-H cells were set as 1 and those of A-L/S-L cells were normalized to these values (For each relative copy number of each selected region,  $P < 0.05$ ; data not shown.)

Case Set: All Tumors (591 patients / 603 samples) [Show all samples](#)

Altered in 90 (15%) of 591 cases/patients

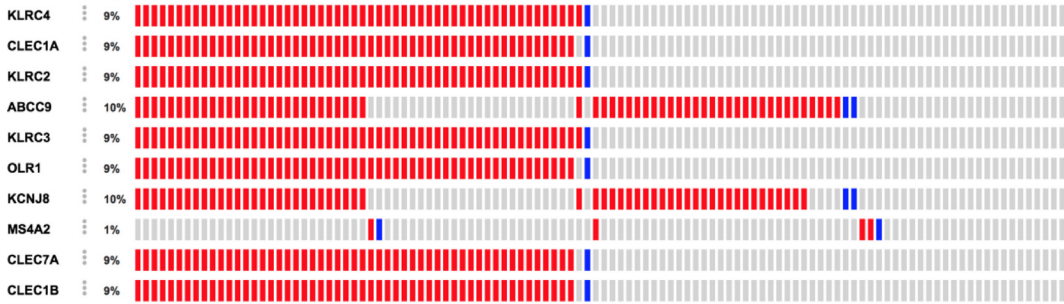

Genetic Alteration █ Amplification █ Deep Deletion

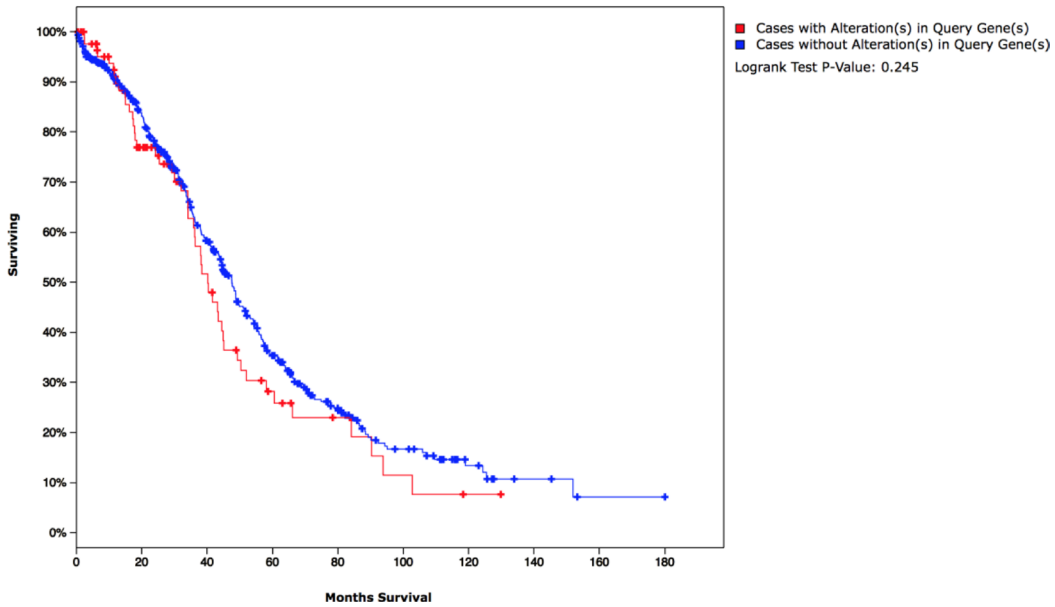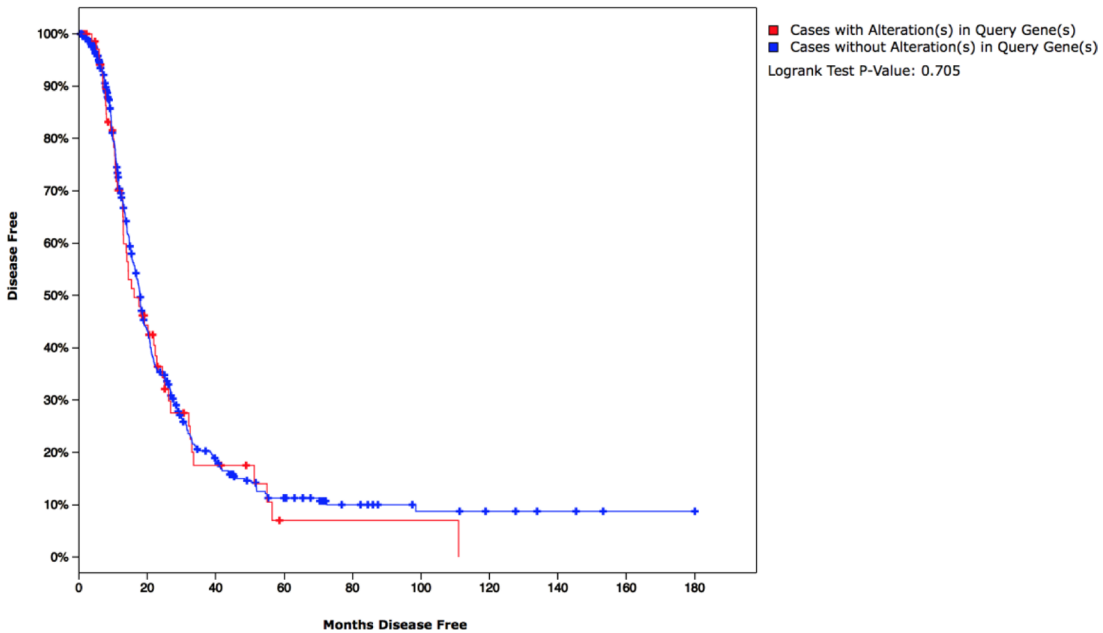

**Supplementary Figure 2: Clinical outcomes associated with the functional gene groups amplified in both A-H- and S-H-specific gains from the TCGA database.** For each gene group, copy number alterations of the member genes are listed. Kaplan-Meier analysis of OS and PFS was performed with the copy number of the gene group as a categorical variable, so that the groups with unaltered and altered copy numbers could be compared. The results of a Cox proportional hazards test, with residual disease as a copredictor, are shown as *P* values. The diagram depicts the detailed number of patients and survival months with unaltered and altered copy numbers.

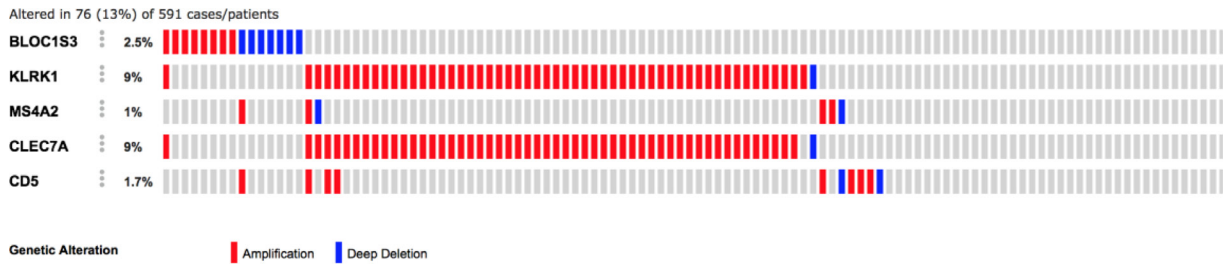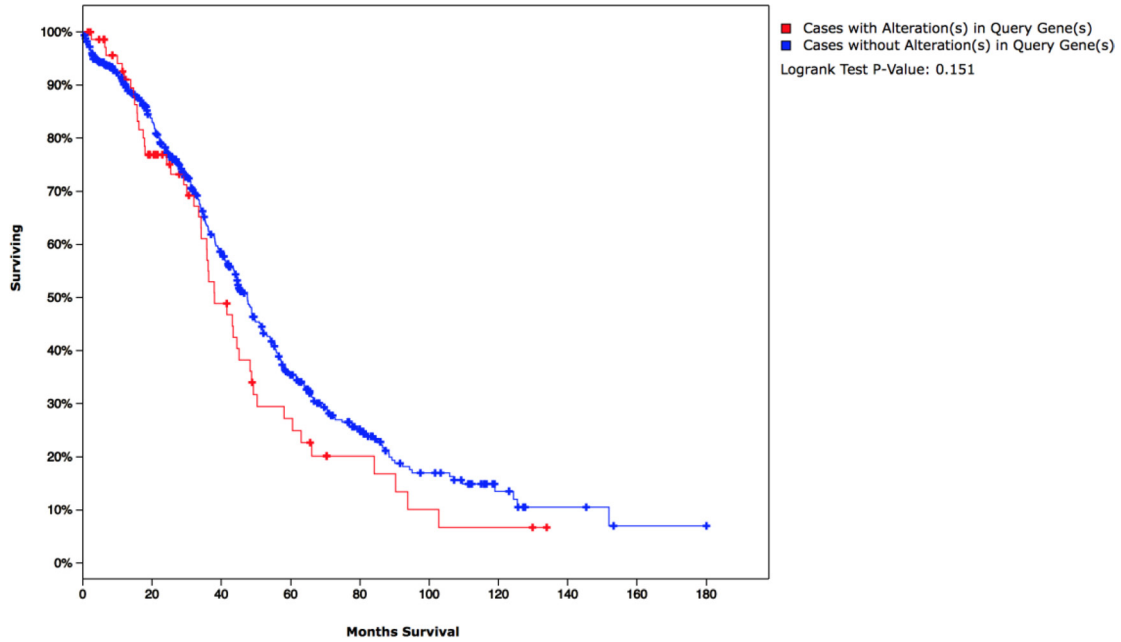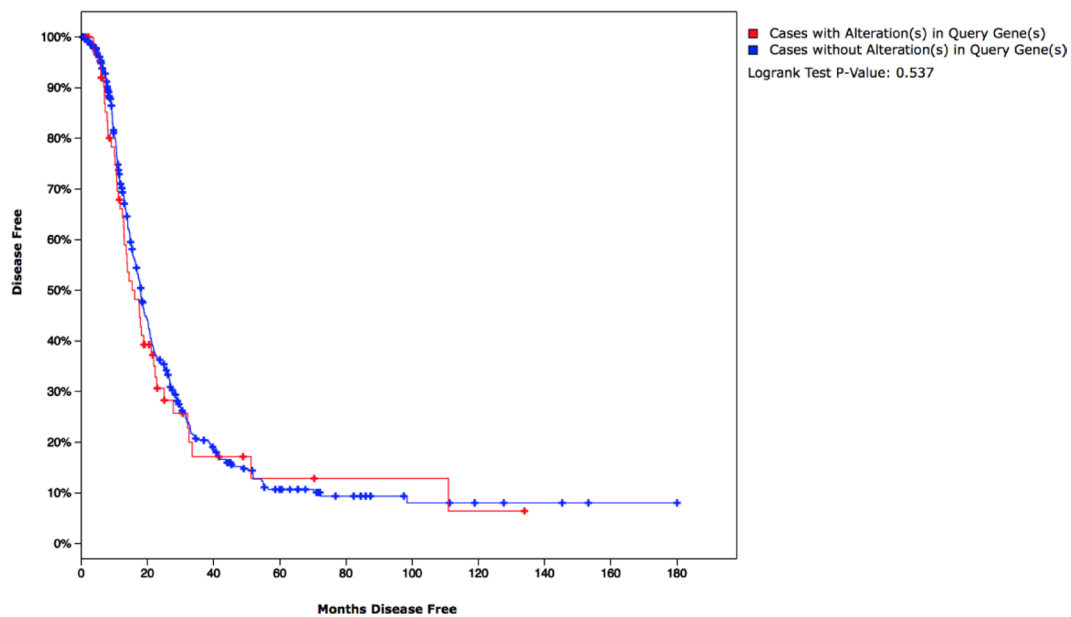

**Supplementary Figure 3: Clinical outcomes associated with the functional gene groups amplified in both A-H- and S-H-specific gains from the TCGA database.** For each gene group, copy number alterations of the member genes are listed. Kaplan-Meier analysis of OS and PFS was performed with the copy number of the gene group as a categorical variable, so that the groups with unaltered and altered copy numbers could be compared. The results of a Cox proportional hazards test, with residual disease as a copredictor, are shown as *P* values. The diagram depicts the detailed number of patients and survival months with unaltered and altered copy numbers.

Case Set: All Tumors (591 patients / 603 samples) [Show all samples](#)

Altered in 99 (17%) of 591 cases/patients

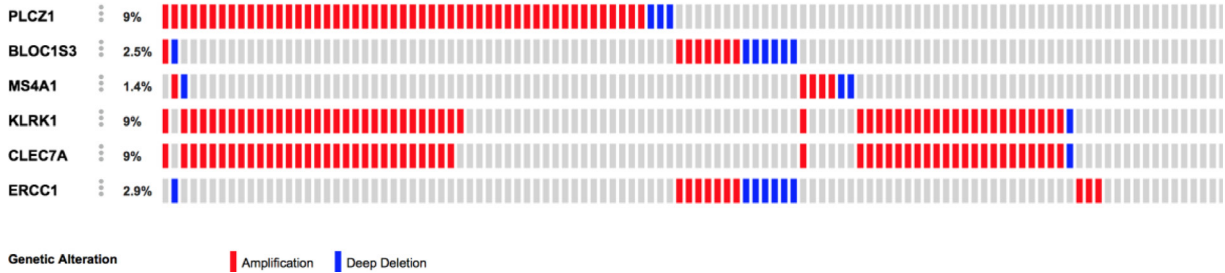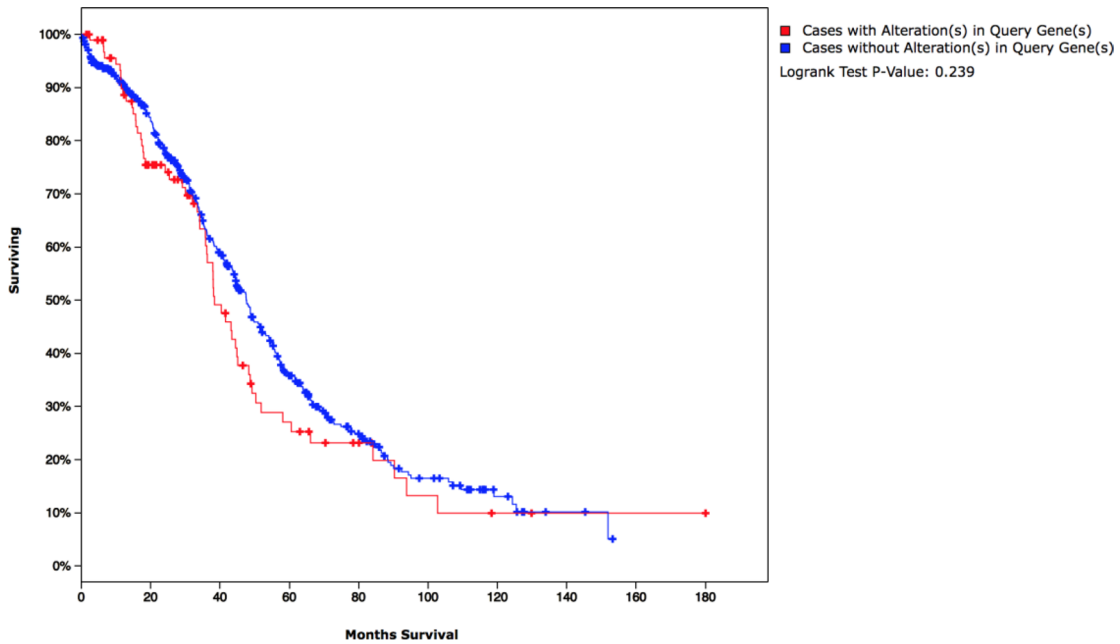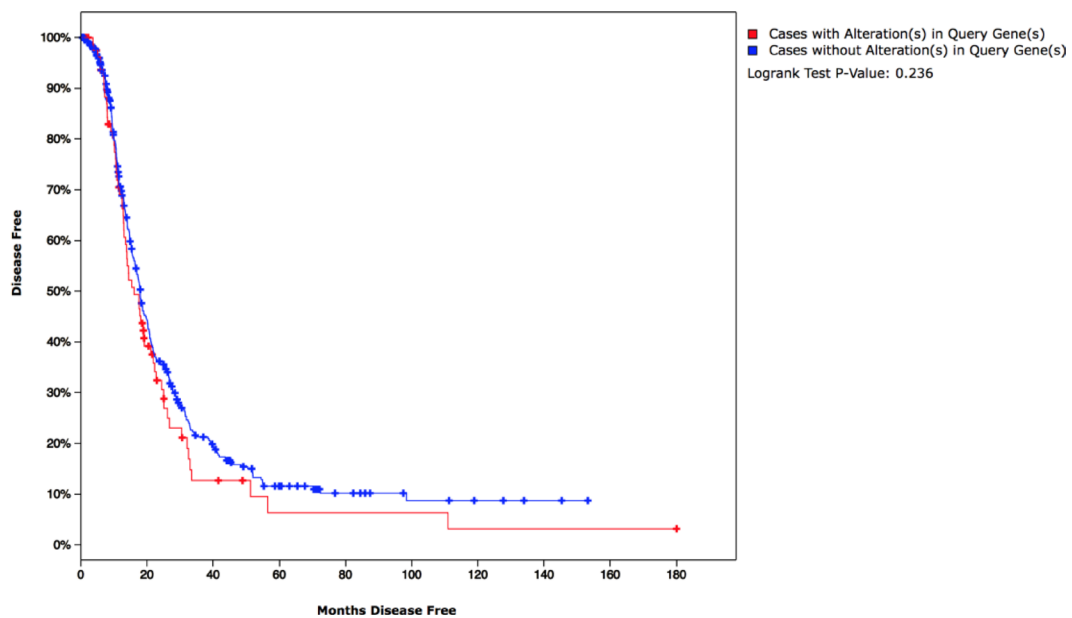

**Supplementary Figure 4: Clinical outcomes associated with the functional gene groups amplified in both A-H- and S-H-specific gains from the TCGA database.** For each gene group, copy number alterations of the member genes are listed. Kaplan-Meier analysis of OS and PFS was performed with the copy number of the gene group as a categorical variable, so that the groups with unaltered and altered copy numbers could be compared. The results of a Cox proportional hazards test, with residual disease as a copredictor, are shown as *P* values. The diagram depicts the detailed number of patients and survival months with unaltered and altered copy numbers.

Case Set: All Tumors (591 patients / 603 samples) [Show all samples](#)

Altered in 27 (5%) of 591 cases/patients

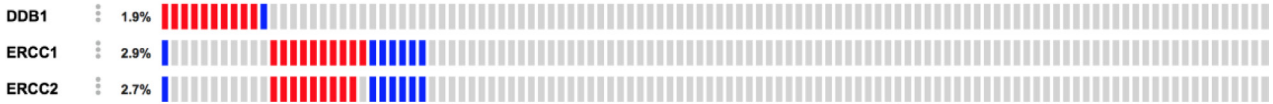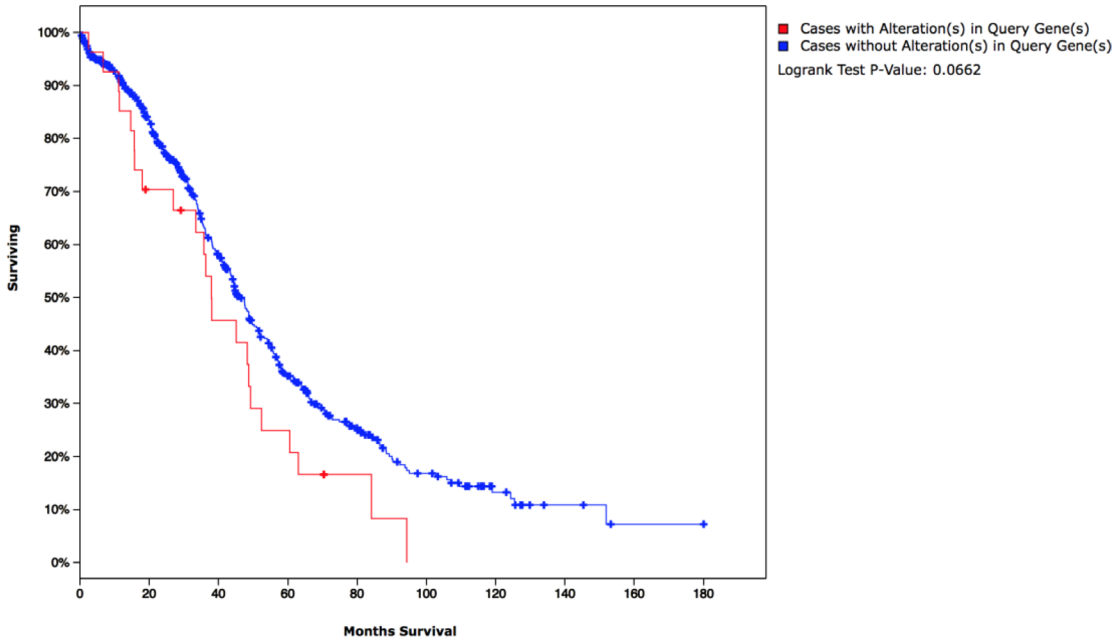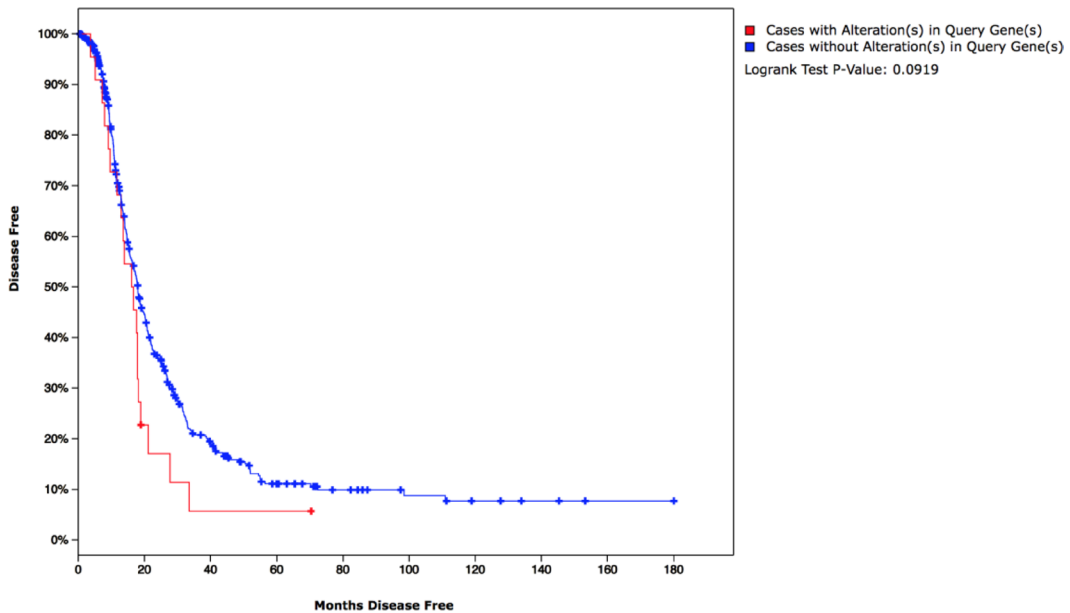

**Supplementary Figure 5: Clinical outcomes associated with the functional gene groups amplified in both A-H- and S-H-specific gains from the TCGA database.** For each gene group, copy number alterations of the member genes are listed. Kaplan-Meier analysis of OS and PFS was performed with the copy number of the gene group as a categorical variable, so that the groups with unaltered and altered copy numbers could be compared. The results of a Cox proportional hazards test, with residual disease as a copredictor, are shown as *P* values. The diagram depicts the detailed number of patients and survival months with unaltered and altered copy numbers.

Case Set: All Tumors (591 patients / 603 samples) [Show all samples](#)

Altered in 108 (18%) of 591 cases/patients

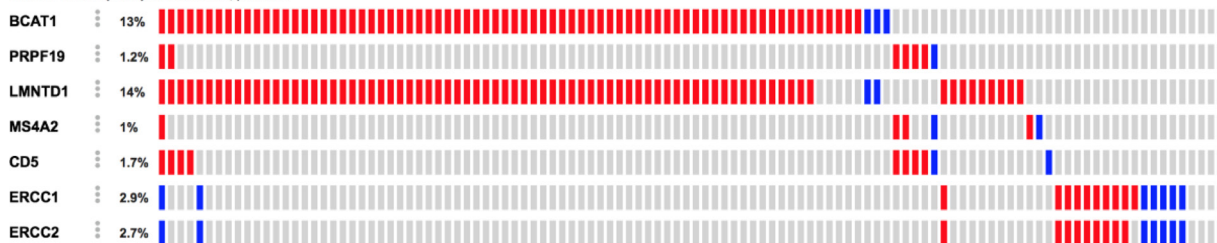

Genetic Alteration ■ Amplification ■ Deep Deletion

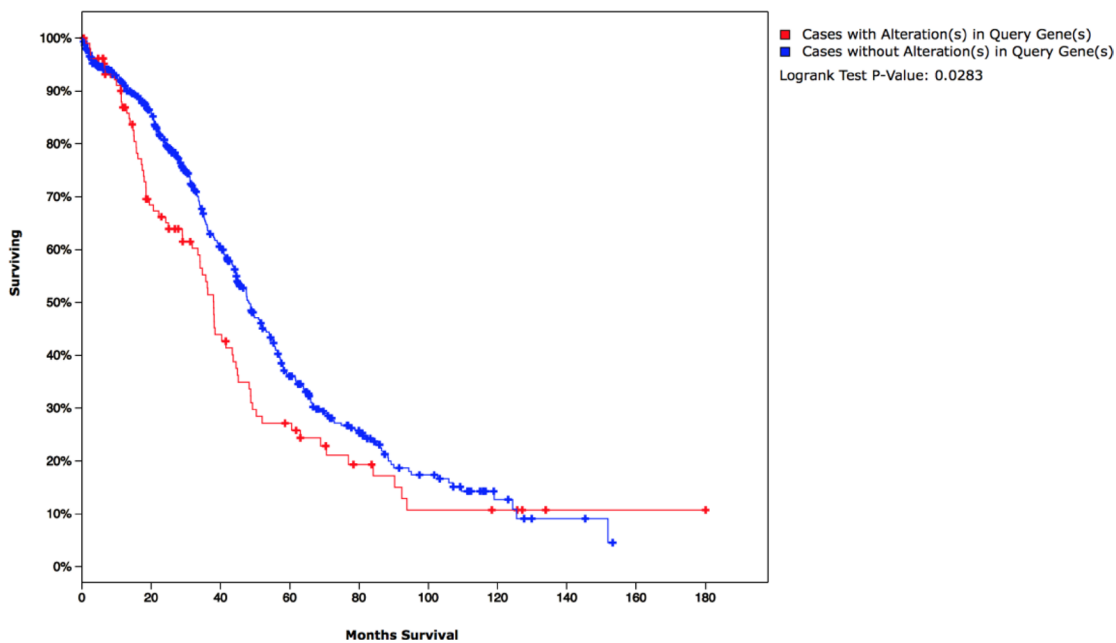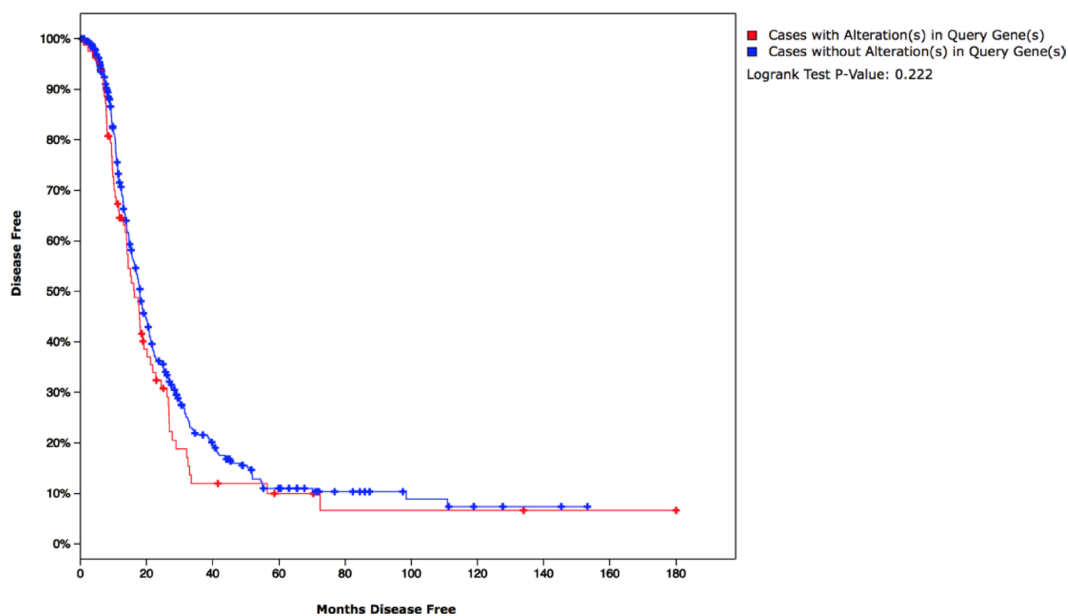

**Supplementary Figure 6: Clinical outcomes associated with the functional gene groups amplified in both A-H- and S-H-specific gains from the TCGA database.** For each gene group, copy number alterations of the member genes are listed. Kaplan-Meier analysis of OS and PFS was performed with the copy number of the gene group as a categorical variable, so that the groups with unaltered and altered copy numbers could be compared. The results of a Cox proportional hazards test, with residual disease as a copredictor, are shown as *P* values. The diagram depicts the detailed number of patients and survival months with unaltered and altered copy numbers.

Case Set: All Tumors (591 patients / 603 samples) [Show all samples](#)

Altered in 118 (20%) of 591 cases/patients

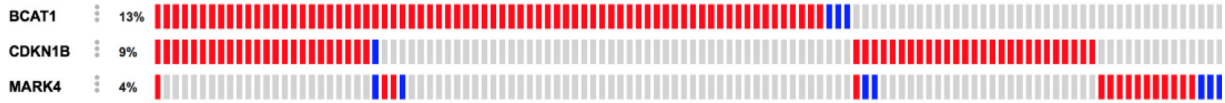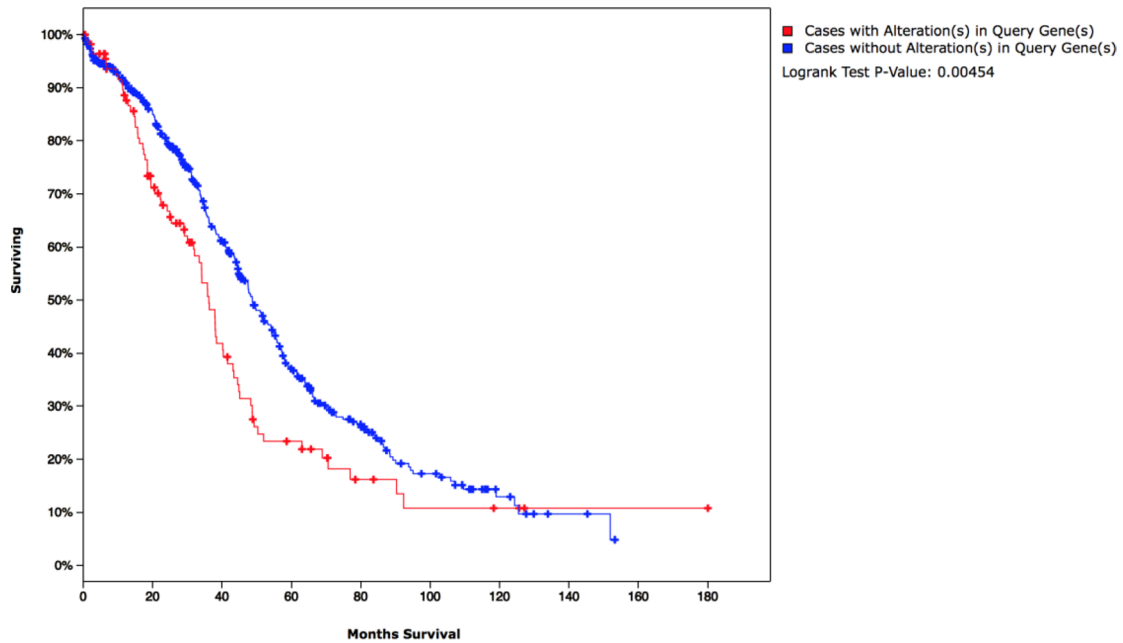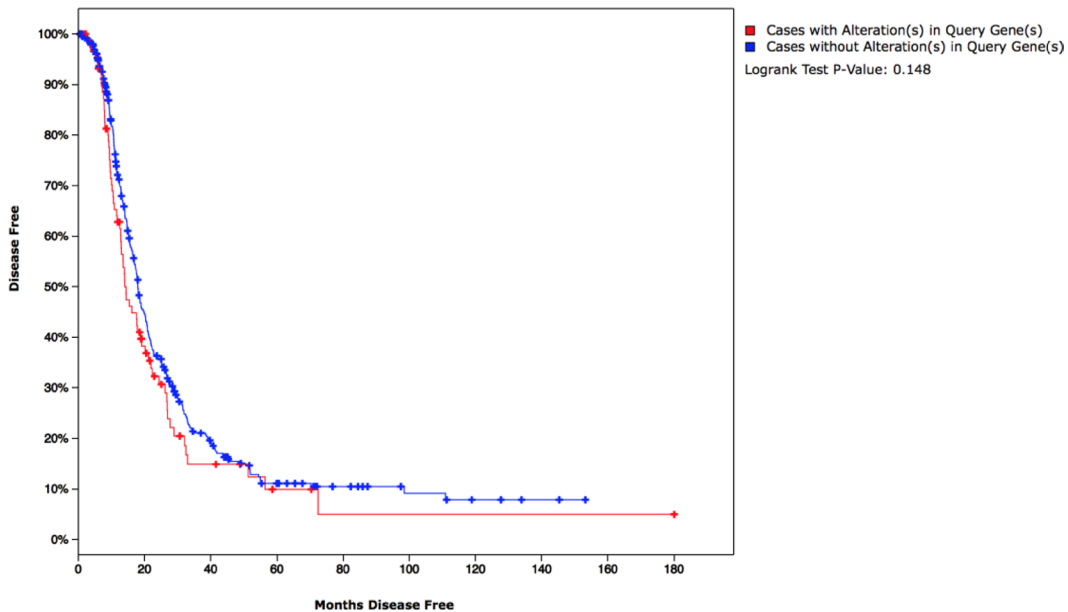

**Supplementary Figure 7: Clinical outcomes associated with the functional gene groups amplified in both A-H- and S-H-specific gains from the TCGA database.** For each gene group, copy number alterations of the member genes are listed. Kaplan-Meier analysis of OS and PFS was performed with the copy number of the gene group as a categorical variable, so that the groups with unaltered and altered copy numbers could be compared. The results of a Cox proportional hazards test, with residual disease as a copredictor, are shown as *P* values. The diagram depicts the detailed number of patients and survival months with unaltered and altered copy numbers.

| Genes           | Differential expression |            | P value    |            |
|-----------------|-------------------------|------------|------------|------------|
|                 | A-H VS A-L              | S-H VS S-L | A-H VS A-L | S-H VS S-L |
| <i>MS4A2</i>    | --                      | --         | ns         | ns         |
| <i>CD5</i>      | --                      | --         | ns         | ns         |
| <i>ERCC1</i>    | ↗                       | ↗          | **         | *          |
| <i>DDB1</i>     | ↗                       | ↗          | **         | *          |
| <i>ERCC2</i>    | ↗                       | ↗          | *          | **         |
| <i>BCAT1</i>    | ↗                       | ↗          | *          | **         |
| <i>PRPF19</i>   | ↗                       | ↗          | *          | *          |
| <i>IFLTD1</i>   | --                      | --         | ns         | ns         |
| <i>CDKN1B</i>   | ↗                       | ↗          | **         | *          |
| <i>MARK4</i>    | ↗                       | ↗          | **         | *          |
| <i>TRAPPC6A</i> | ↗                       | --         | **         | ns         |
| <i>EXOC3L2</i>  | ↗                       | --         | ***        | ns         |
| <i>CKM</i>      | ↗                       | ↗          | *          | *          |
| <i>KLC3</i>     | ↘                       | ↗          | ns         | ns         |
| <i>PPP1R13L</i> | ↗                       | ↗          | *          | *          |
| <i>CD3EAP</i>   | ↗                       | ↗          | **         | **         |
| <i>FOSB</i>     | ↗                       | ↘          | *          | *          |
| <i>RTN2</i>     | ↗                       | ↗          | *          | *          |
| <i>PPMIN</i>    | ↘                       | ↘          | *          | ns         |
| <i>VASP</i>     | ↗                       | --         | *          | ns         |
| <i>OPA3</i>     | ↗                       | ↗          | *          | *          |
| <i>BCL2L14</i>  | ↘                       | --         | ns         | ns         |
| <i>LRP6</i>     | ↗                       | ↗          | *          | *          |
| <i>MANSC1</i>   | ↗                       | --         | ns         | ns         |
| <i>DUSP16</i>   | ↗                       | ↗          | **         | ns         |
| <i>CREBL2</i>   | --                      | ↗          | ns         | *          |
| <i>GPR19</i>    | ↗                       | ↘          | *          | **         |
| <i>ST8SIA1</i>  | ↗                       | --         | *          | ns         |
| <i>PPP1R37</i>  | ↘                       | --         | *          | ns         |
| <i>MS4A8</i>    | --                      | --         | ns         | ns         |
| <i>MS4A15</i>   | --                      | --         | ns         | ns         |

Note: ↗: increase; ↘: decrease; --: no change; \*:  $P < 0.05$ ; \*\*:  $P < 0.01$ ; \*\*\*:  $P < 0.001$ ; ns: not significant.



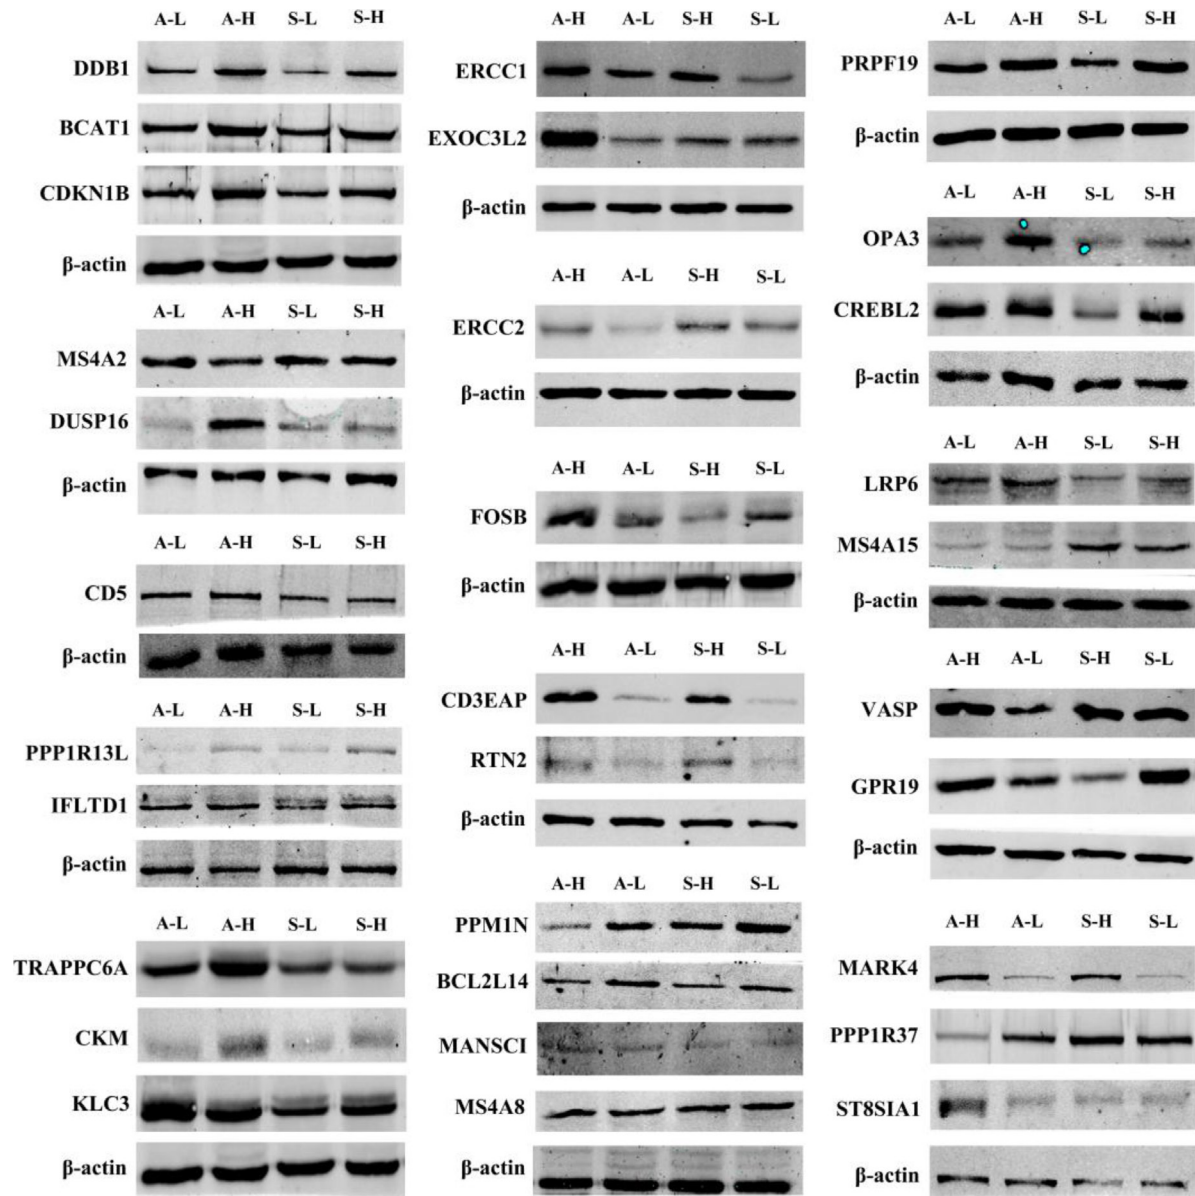

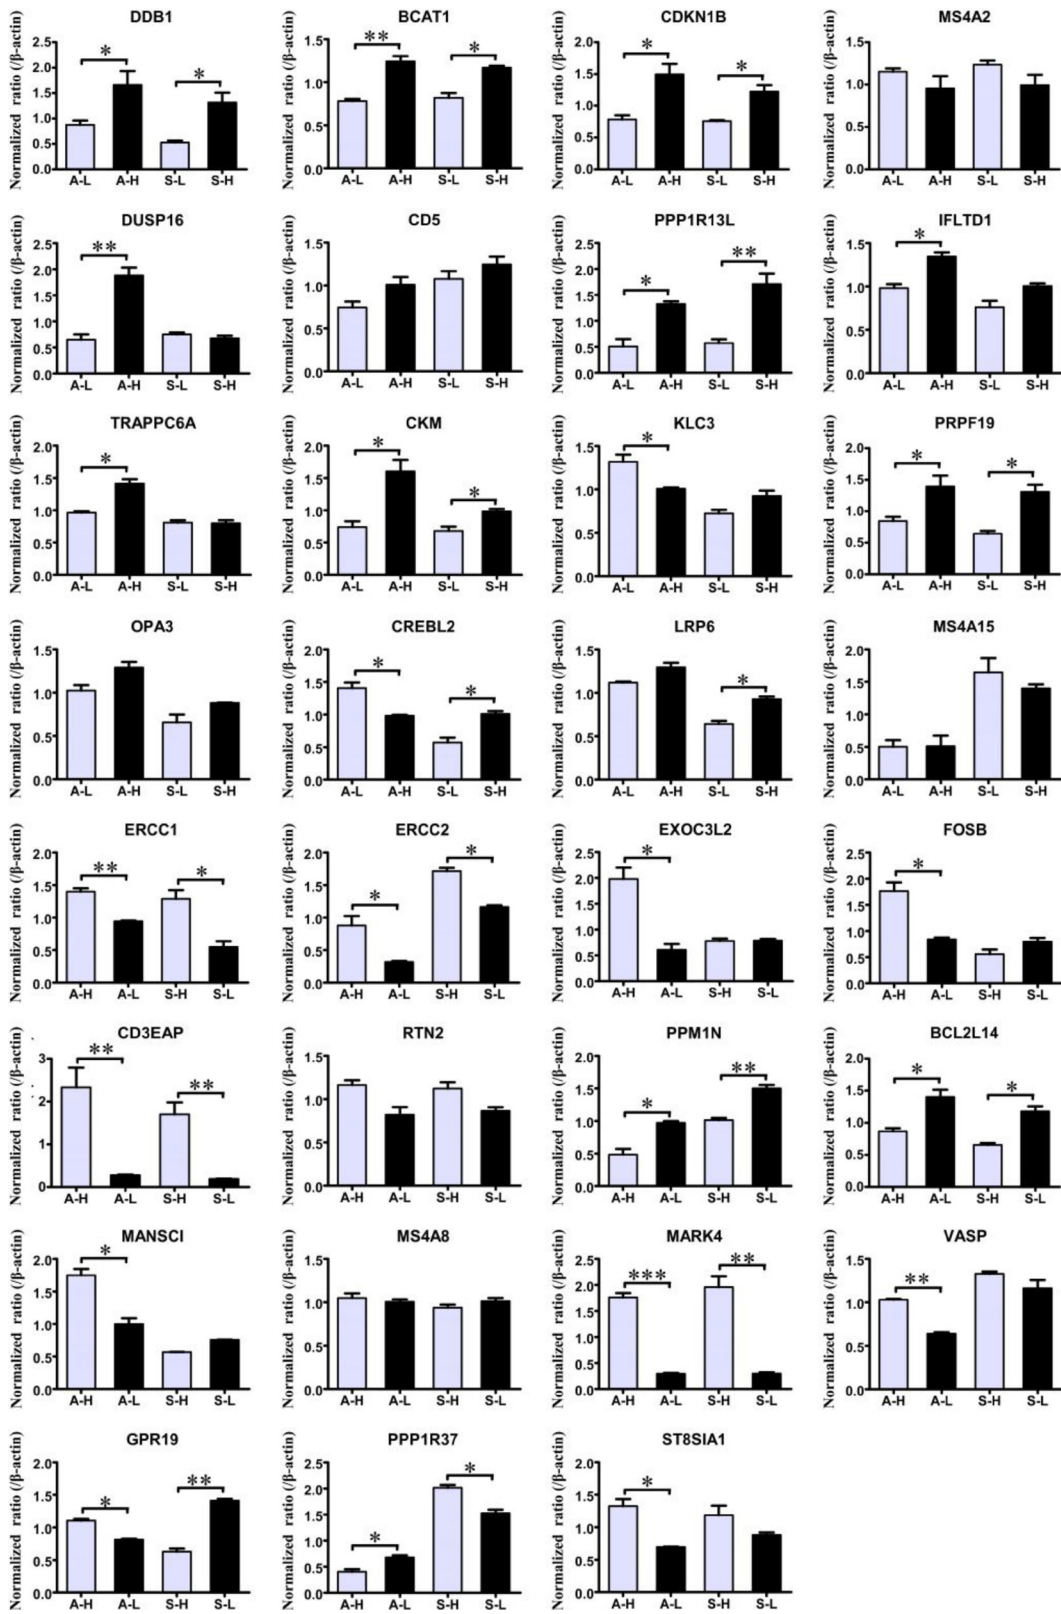

**Supplementary Figure S8: Expression levels of all the selected genes in the distinct invasive/migratory subclones.** (A) RT-PCR analysis of the mRNA expression of the selected genes. (B) Western blot analysis displayed the protein levels of all the selected genes in A-H vs. A-L and S-H vs. S-L. (C) The data in the bar graphs were normalized to  $\beta$ -actin. Error bars represent the SEM,  $n = 3$  (\* $P < 0.05$ . \*\* $P < 0.01$ . \*\*\* $P < 0.001$ ).

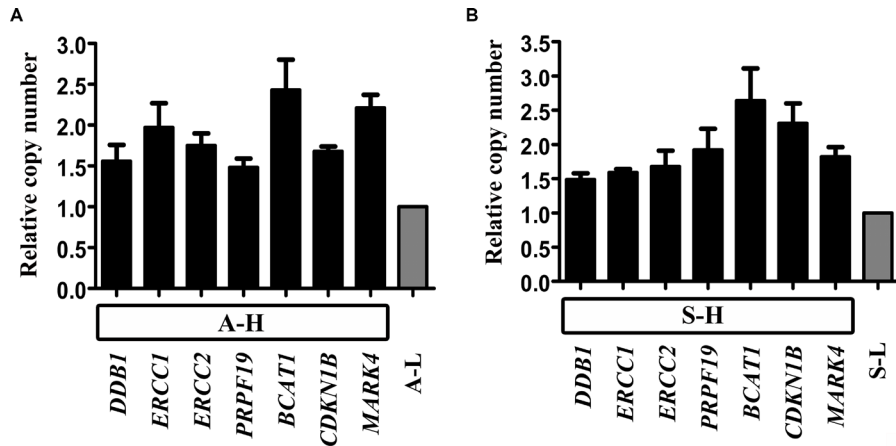

**Supplementary Figure 9: Validation of the CNV data of the candidate genes.** Relative gene copy numbers of the 7 candidate genes were determined by RT-PCR with DNA from (A) A-H and A-L or (B) S-H and S-L cells. The data shown are the average values from three independent experiments  $\pm$  SEM. The relative gene copy numbers of A-L/S-L cells were set as 1 and those of A-H/S-H cells were normalized to these values (For each relative copy number of each gene,  $P < 0.05$ ; data not shown).

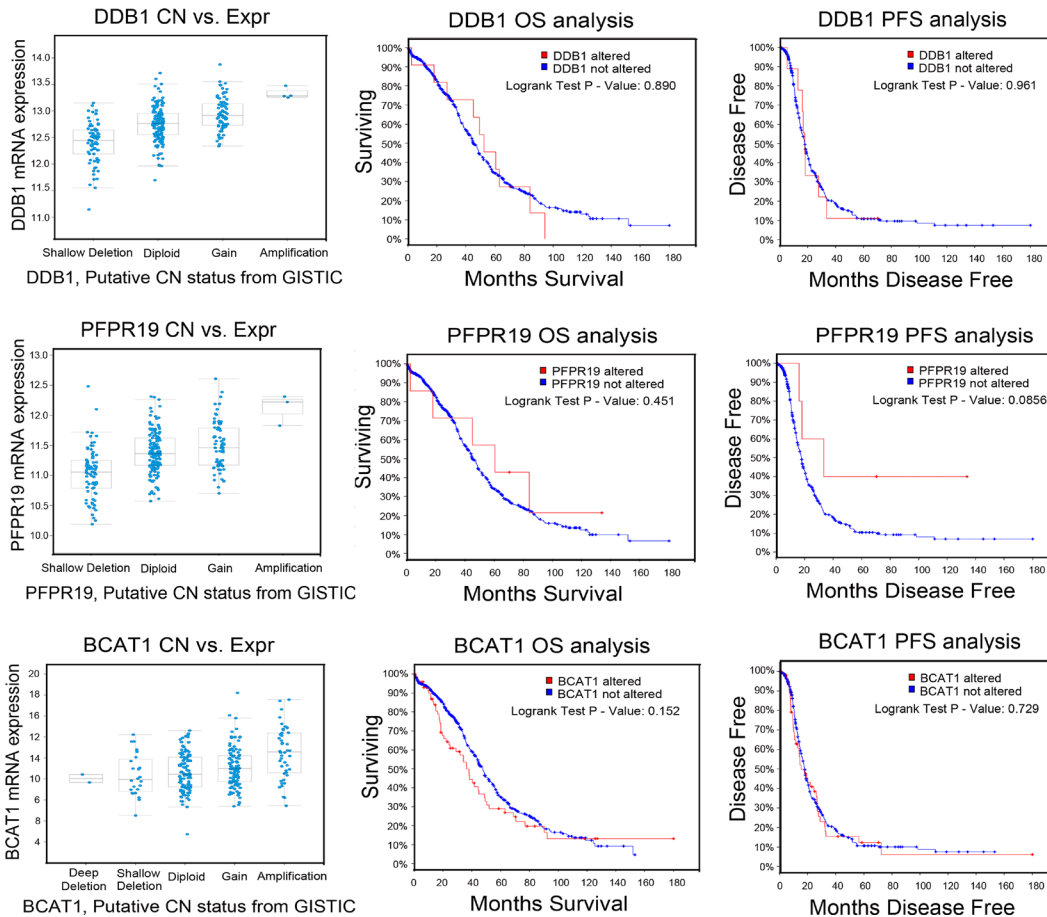

**Supplementary Figure 10: Reproduction of data from the TCGA database with the cBioPortal tool.** The graphs indicated the association of amplifications of candidate genes *DDB1*, *PFPR19* and *BCAT1* with gene expression and patient outcomes.

**Supplementary Table 1: Primers used for qPCR validation of CNVs**

| <b>Primer name</b>       | <b>Forward</b>          | <b>Reverse</b>            | <b>Amplicon/bp</b> |
|--------------------------|-------------------------|---------------------------|--------------------|
| RNase P-2                | TTTACTCCCACAGCACCTCC    | GGAATTTGGAGTGACCAAAGG     | 105                |
| <b>A-H-specific gain</b> |                         |                           |                    |
| 11q12.2                  | AAAAGCGCTCCATCTCCCAA    | CTGGGTTGGGACAGAGTCAA      | 140                |
| 12p13.1                  | CAGCTTGCCCGAGTTCTACT    | TGTCCTCAGAGTTAGCCGGA      | 137                |
| 12p12.1                  | CACAAAGAAAGCCCTCCCCA    | CTGTGTTTCTCCCTTCTCAGGAT   | 150                |
| 19q13.32                 | GTCGCCAGAAATGGATGTGC    | CTCTTCTGGTGGTGGACGG       | 147                |
| <b>A-H-specific loss</b> |                         |                           |                    |
| 4q25                     | TATGGAACCTTCGCCTTCCTC   | ATCAGCTTGTCTGGGAATCA      | 150                |
| 5q21.3                   | GAACATGTATCGATTCGAGGGC  | AAGCACCTACCTTAGGAATAGGATT | 134                |
| 5q22.2                   | TCCCTGGAGTAAACTGCGG     | ACCCATAGGAACAGGACTGC      | 104                |
| 5q31.2                   | GAGGAATGCTGGCAATGAACA   | TCCCCAAATCATGACTGTACCTG   | 117                |
| 5q33.3                   | GGAATTGGGGCAGAAATGAGC   | TCACCATGGGAAAACGTCCT      | 117                |
| 9q34.12                  | GGAGATCTGCCTGAAGCTGG    | CTACTCAGCCCAACCCGTG       | 107                |
| 9q34.3                   | AGTGCCTCTGACCACACTTC    | TTCCCCAAGGGACCCTAGAA      | 145                |
| 9q22.33                  | TGGCTGTTAGGCTATTGGCTT   | TGGCACACTACACACAGCAT      | 131                |
| <b>A-L-specific gain</b> |                         |                           |                    |
| 2q32.3                   | TGCCTTCCCACAGAGTTAAAAGA | TTATGTTTCACCCACCTGAGCC    | 147                |
| 2q32.2                   | ACACCATTGGTCTCGTGTCT    | ACCTGTCACTAGGCAGCATT      | 129                |
| 15q25.1                  | TGTTCTGGCAGTGTCTACGG    | AGGTCCAAGCAAAACGTCCA      | 124                |
| <b>S-H-specific gain</b> |                         |                           |                    |
| 11q12.1                  | GCGAATACCATGTGACTC      | ATCGGGCTTCTATCTACC        | 165                |
| 12p13.1                  | CAGCTTGCCCGAGTTCTACT    | TGTCCTCAGAGTTAGCCGGA      | 137                |
| 12p12.1                  | CACAAAGAAAGCCCTCCCCA    | CTGTGTTTCTCCCTTCTCAGGAT   | 150                |
| 19q13.32                 | GTCTCCAGAGTATCCCTGTCA   | AGAGCAAGACTCCGTTCC        | 179                |
| <b>S-H-specific loss</b> |                         |                           |                    |
| 8p23.3                   | ACCTTTCTGCTGCGTGAC      | GGACCTGAGTTTGATTTG        | 158                |
| 17p13.1                  | ATCTTATAGTTGCCTGTGGG    | CTTCAATCTTAATTTGGGTG      | 199                |
| <b>S-L-Specific gain</b> |                         |                           |                    |
| 2p14                     | GTATCCCTTCTCCTCGTTTG    | TCAGGACTGCTGTCACCC        | 155                |
| 3p21.31                  | TACAGGAAACCCATAGAA      | ATAACCGTCTGAAACTCA        | 116                |
| 10q24.32                 | AGGTGTAAGGGCAAGAGTG     | GAGTCAGCGAAGGCGATA        | 117                |
| 10q26.3                  | CCCTGATGCTTCTGTTC       | CACAAGTTTCTCGATTACTG      | 118                |
| 15q11.2                  | AGTGAGCCTAGATTACACC     | TATACTTGGCACCTTTGT        | 182                |
| 15q15.2                  | AGGGAAGCCACGACTCTG      | TTCGGTCTTCAACAATCC        | 216                |
| 15q22.31                 | GAGTGGCGGCTGATTGTT      | TGGTGCTGGACTTCGTTCC       | 168                |
| <b>S-L-Specific loss</b> |                         |                           |                    |
| 8p12                     | GCGGTGCGGTAAGTTCCT      | CAGTGGCAAAGCCTAAGACAA     | 212                |
| 8p11.23                  | CTCGGCTGCCATCCTCCT      | CCACCACCACCTTCCACA        | 242                |
| <b>Candidate genes</b>   |                         |                           |                    |
| <i>DDBI</i>              | ACAGGGACAGCAGGTGGT      | CTGCCTCTTCAGGATACACC      | 246                |
| <i>ERCC1</i>             | AAGGCACTGTCCATTATC      | GGAGGGTAGCAGCAGATT        | 102                |
| <i>ERCC2</i>             | GGTTTGAAGAGTGGTTGG      | CTCATAGAATCGGCAGTG        | 177                |
| <i>PRPF19</i>            | CCAAGGGCTGACTCCA        | GAGACGGGCAATGACACG        | 185                |
| <i>BCAT1</i>             | CACTTCCAGCTTTCCTT       | GTACCAGAGCCAAACATC        | 234                |
| <i>CDKN1B</i>            | GAATAAGGAAGCGACCTG      | AATCAGAATACGCCGAAA        | 122                |
| <i>MARK4</i>             | CCAGAAGGTCAAGCCACT      | AACGCTCAGAAGAACAAA        | 197                |

**Supplementary Table 2: Primers used for mRNA expression of the selected genes**

| Gene     | Forward                | Reverse                 | Amplicon/bp |
|----------|------------------------|-------------------------|-------------|
| MS4A2    | GGCCTATATCCACATCCACAGT | TACCAAGTCCCAGAATGGTGA   | 116         |
| CD5      | TGACCTGCTTAGAACCCAGAG  | GCTGCCGCTGTAGAACTCC     | 152         |
| ERCC1    | CTACGCCGAATATGCCATCTC  | GTACGGGATTGCCCCCTCTG    | 161         |
| DDB1     | ACCGGACACTTTACTTCCGGC  | TCGGCGGTGACCACATAGA     | 83          |
| ERCC2    | AGAAGGTGATTGAAGAGCTTCG | ACCTCAGGGTGAATACACAAGT  | 121         |
| BCAT1    | AGCCCTGCTCTTTGTACTCTT  | CCAGGCTCTTACATACTTGGGA  | 103         |
| PRPF19   | CGAGAAGTACATTGCGGAGAAT | GCTGGTACAGAGCGTGTGAC    | 239         |
| IFLTD1   | TCCGAAAGCGTGTGTTTCAGT  | CTTGAGCTTGTTCACCTGAT    | 108         |
| CDKN1B   | TAATTGGGGCTCCGGCTAACT  | TGCAGGTCGCTTCCTTATTCC   | 116         |
| MARK4    | TGAAGGGCCTAAACCACCC    | CCAGCACTTGCCTACTCCA     | 94          |
| TRAPPC6A | CTGGAGGGTATGGGGTTCC    | TTGTCTTGCAGGACGTAGGTC   | 185         |
| EXOC3L2  | CGTGTGGAGCGATTCCATGA   | GGCGATGGTCTTGCTGATATAG  | 75          |
| CKM      | ATGCCATTCGGTAACACCCAC  | GCTTCTTGTAGAGTTCAAGGGTC | 124         |
| KLC3     | GCCACGCTCAACAACCTGG    | CGCTCCACGTCCTCAAACCT    | 188         |
| PPP1R13L | TGCAACGACACAGTCATCTG   | GCCCCATACTCTGCTCGAC     | 163         |
| CD3EAP   | AGATACGGAGCTGTGGCTTAT  | CCCATTGAAGCATTCTGGGG    | 61          |
| FOSB     | GCTGCAAGATCCCCTACGAAG  | ACGAAGAAGTGTACGAAGGGTT  | 249         |
| RTN2     | TCAGGGTTTACCGCAAAGTG   | CTTGAGGGAATCCACGAGGTC   | 200         |
| PPM1N    | CGAGCGTTGGGCGACTTTA    | CAGGAGCATGAACTCGTCCTC   | 123         |
| VASP     | ATGGCAACAAGCGATGGCT    | CGATGGCACAGTTGATGACCA   | 147         |
| OPA3     | CCTATGGCGAAGCTGCTATAC  | GGCGGCCTCCTTAATACGG     | 75          |
| BCL2L14  | CAAAATCCTCGCCTACTACACC | GACTCATTGCTGAACAATTCCC  | 126         |
| LRP6     | TGTCAGCGAAGAAGCCATTA   | TCTAAGGCAATAGCTCTGGGT   | 231         |
| MANSC1   | CACTAAGGCTGTCTGCTAGTCA | TCGAGTGTGGAAGATCATCAAGT | 203         |
| DUSP16   | CCTGACTTTATCCCCGAGTCT  | GAGATCCCAGCTAAACAGTGC   | 155         |
| CREBL2   | AGTAAAGAAGCCCGTAAACG   | CGACTGGATACCAACTCTTCCAA | 144         |
| GPR19    | ATCTTCGGCAATTCCTGGTT   | GCAACGCTGATGAGAAGGTC    | 113         |
| ST8SIA1  | GTCCTCTGTTGGCTCTACATCT | CCCCGTCATAACCACATGCTC   | 214         |
| PPP1R37  | CTCGACTGTCTGGACCTGAAA  | GCCGAGGCACCATCTTCATC    | 134         |
| MS4A8    | GGCTTGAACATCGTCAGT     | GCGTAAGGATAATAGTCG      | 107         |
| MS4A15   | TGTGGACAGGGGCTATCTGG   | GAAGTGCATGGCAATGACCG    | 79          |
| GAPDH    | TGTTGCCATCAATGACCCCTT  | CTCCACGACGTACTIONCAGCG  | 102         |

**Supplementary Table 3: Details about primary antibodies used for Western blotting**

| <b>Genes</b> | <b>Antibodies</b>                                    | <b>Catalog No.</b> | <b>Supplier</b>    |
|--------------|------------------------------------------------------|--------------------|--------------------|
| MS4A2        | Rabbit polyclonal to MS4A2                           | ab203747           | ABCAM, Inc. UK     |
| CD5          | Anti-CD5 (26-40) antibody produced in rabbit         | SAB1104201         | Sigma-Aldrich, USA |
| ERCC1        | Anti-ERCC1 antibody produced in rabbit               | SAB4500795         | Sigma-Aldrich, USA |
| DDB1         | Anti-DDB1 antibody produced in mouse                 | SAB1405702         | Sigma-Aldrich, USA |
| ERCC2        | Monoclonal Anti-ERCC2 antibody produced in mouse     | WH0002068M1        | Sigma-Aldrich, USA |
| BCAT1        | rabbit BCAT1 Antibody                                | 12822              | CST, USA           |
| PRPF19       | Anti-PRPF19 antibody produced in rabbit              | SAB4501215         | Sigma-Aldrich, USA |
| IFLTD1       | ANTI-IFLTD1 (C-TERM) antibody produced in rabbit     | SAB1303298         | Sigma-Aldrich, USA |
| CDKN1B       | p27 Kip1 (D69C12) XP® Rabbit mAb                     | 3686               | CST, USA           |
| MARK4        | rabbit MARK4 Antibody                                | 4834               | CST, USA           |
| TRAPPC6A     | Anti-TRAPPC6A antibody produced in rabbit            | HPA043043          | Sigma-Aldrich, USA |
| EXOC3L2      | ANTI-EXOC3L2 (N-TERM) antibody produced in rabbit    | SAB1302947         | Sigma-Aldrich, USA |
| CKM          | Anti-CKM (166-180) antibody produced in rabbit       | C1869              | Sigma-Aldrich, USA |
| KLC3         | Anti-KLC3 antibody                                   | ab168242           | ABCAM, Inc. UK     |
| PPP1R13L     | Anti-iASPP antibody                                  | ab34898            | ABCAM, Inc. UK     |
| CD3EAP       | Anti-PAF49 antibody                                  | ab76933            | ABCAM, Inc. UK     |
| FOSB         | FosB (5G4) Rabbit mAb                                | 2251               | CST, USA           |
| RTN2         | Anti-Reticulon 2 antibody                            | ab103170           | ABCAM, Inc. UK     |
| PPM1N        | Anti-PPM1N antibody                                  | ab168300           | ABCAM, Inc. UK     |
| VASP         | VASP (9A2) Rabbit mAb                                | 3132               | CST, USA           |
| OPA3         | Anti-OPA3 antibody                                   | ab69163            | ABCAM, Inc. UK     |
| BCL2L14      | Anti-Bcl G antibody                                  | ab115467           | ABCAM, Inc. UK     |
| LRP6         | LRP6 (C5C7) Rabbit mAb                               | 2560               | CST, USA           |
| MANSC1       | Anti-MANSC1 antibody produced in rabbit              | HPA007955          | Sigma-Aldrich, USA |
| DUSP16       | Anti-DUSP16, C-Terminal antibody produced in rabbit  | SAB4503215         | Sigma-Aldrich, USA |
| CREBL2       | Anti-CREBL2 (N-term K27) antibody produced in rabbit | SAB1300866         | Sigma-Aldrich, USA |
| GPR19        | Anti-GPR19 antibody produced in rabbit               | SAB2900709         | Sigma-Aldrich, USA |
| ST8SIA1      | Anti-ST8SIA1 antibody                                | ab37806            | ABCAM, Inc. UK     |
| PPP1R37      | Anti-PPP1R37 antibody produced in rabbit             | HPA041500          | Sigma-Aldrich, USA |
| MS4A8        | Anti-MS4A8 antibody produced in rabbit               | HPA007318          | Sigma-Aldrich, USA |
| MS4A15       | Mouse polyclonal to MS4A15                           | ab72697            | ABCAM, Inc. UK     |

**Supplementary Table 4: Shared and specific CNV regions for A-H and A-L.**

See Supplementary\_Table\_4

**Supplementary Table 5: Functional enrichment of genes in A-H- or A-L-specific CNV regions.**

See Supplementary\_Table\_5

**Supplementary Table 6: Shared and specific CNV regions for S-H and S-L .**

See Supplementary\_Table\_6

**Supplementary Table 7: Functional enrichment of genes in S-H- or S-L-specific CNV regions.**

See Supplementary\_Table\_7

**Supplementary Table 8: Analysis of genes identified in CNV regions shared by both highly and minimally invasive/migratory subclones and further amplified in one subclone.**

See Supplementary\_Table\_8

**Supplementary Table 9: Functional enrichment of genes identified in CNV regions in both highly or both minimally invasive/migratory subclones. See Supplementary\_Table\_9**

**Supplementary Table 10: Analysis of genes amplified in both highly invasive/migratory subclones in the TCGA ovarian cancer database (TCGA, Provisional) with the cBioPortal tool.**

See Supplementary\_Table\_10
